# Supplementary material
Source: MDPI journal article supplement (https://www.mdpi.com/2077-1312/11/5/915)
Supplement: s1 [file s1]

|      | new sample<br>numeration | original sample<br>numeration | position (cm) | Foraminifer<br>analysis | Nannofossil<br>analysis | new sample<br>numeration | original sample<br>numeration | position (cm) | Foraminifer<br>analysis | Nannofossil<br>analysis |                |
|------|--------------------------|-------------------------------|---------------|-------------------------|-------------------------|--------------------------|-------------------------------|---------------|-------------------------|-------------------------|----------------|
| TVCZ | 69                       | 41                            | 2940          | barren                  | yes                     | TVCZ                     | 34                            | 12            | 1190                    | yes                     | yes            |
| TVCZ | 68                       | 40                            | 2935          | barren                  | barren                  | TVCZ                     | 33                            | 11            | 1130                    | yes                     | yes            |
| TVCZ | 67                       | 39                            | 2930          | barren                  | barren                  | TVCZ                     | 32                            | 10            | 1100                    | oligotypical            | yes            |
| TVCZ | 66                       | 38                            | 2915          | barren                  | barren                  | TVCZ                     | 31                            | 44            | 1095                    | oligotypical            | yes            |
| TVCZ | 65                       | 37                            | 2885          | barren                  | yes                     | TVCZ                     | 30                            | 9             | 1060                    | yes                     | yes            |
| TVCZ | 64                       | 36                            | 2630          | barren                  | barren                  | TVCZ                     | 29                            | 8             | 1030                    | missing<br>sample       | missing sample |
| TVCZ | 63                       | 35                            | 2605          | barren                  | barren                  | TVCZ                     | 28                            | 7B            | 995                     | missing<br>sample       |                |
| TVCZ | 62                       | 34                            | 2530          | barren                  | barren                  | TVCZ                     | 27                            | 7             | 940                     | yes                     | yes            |
| TVCZ | 61                       | 33                            | 2490          | barren                  | barren                  | TVCZ                     | 26                            | 45            | 930                     | oligotypical            | yes            |
| TVCZ | 60                       | 32                            | 2365          | barren                  | barren                  | TVCZ                     | 25                            | 6B            | 920                     | missing<br>sample       | yes            |
| TVCZ | 59                       | 31                            | 2235          | barren                  | barren                  | TVCZ                     | 24                            | 6             | 855                     | yes                     | oligotypical   |
| TVCZ | 58                       | 30                            | 2225          | barren                  | barren                  | TVCZ                     | 23                            | 5             | 795                     | yes                     | yes            |
| TVCZ | 57                       | 29                            | 2200          | barren                  | barren                  | TVCZ                     | 22                            | 4             | 760                     | yes                     | yes            |
| TVCZ | 56                       | 28                            | 2100          | barren                  | barren                  | TVCZ                     | 21                            | 3             | 710                     | yes                     | yes            |
| TVCZ | 55                       | 27                            | 2065          | barren                  | barren                  | TVCZ                     | 20                            | 2             | 685                     | barren                  | yes            |
| TVCZ | 54                       | 26                            | 2010          | barren                  | barren                  | TVCZ                     | 19                            | 43            | 670                     | oligotypical            | yes            |
| TVCZ | 53                       | 22                            | 1875          | barren                  | yes                     | TVCZ                     | 18                            | 1             | 655                     | yes                     | yes            |
| TVCZ | 52                       | 25                            | 1855          | barren                  | yes                     | TVCZ                     | 17                            | 42            | 640                     | yes                     | yes            |
| TVCZ | 51                       | 24                            | 1820          | barren                  | yes                     | TVCZ                     | 16                            | 46            | 600                     | yes                     | yes            |
| TVCZ | 50                       | 21                            | 1780          | barren                  | yes                     | TVCZ                     | 15                            | 47            | 550                     | yes                     | yes            |
| TVCZ | 49                       | 23                            | 1750          | barren                  | yes                     | TVCZ                     | 14                            | 48            | 495                     | yes                     | yes            |
| TVCZ | 48                       | 20                            | 1710          | barren                  | yes                     | TVCZ                     | 13                            | 49            | 455                     | yes                     | yes            |
| TVCZ | 47                       | 19 bis                        | 1670          | barren                  | barren                  | TVCZ                     | 12                            | 50            | 425                     | yes                     | yes            |
| TVCZ | 46                       | 19                            | 1650          | barren                  | oligotypical            | TVCZ                     | 11                            | 51            | 395                     | yes                     | yes            |
| TVCZ | 45                       | 18B                           | 1590          | missing<br>sample       | yes                     | TVCZ                     | 10                            | 52            | 375                     | yes                     | yes            |
| TVCZ | 44                       | 18 bis                        | 1555          | yes                     | yes                     | TVCZ                     | 9                             | 53            | 320                     | yes                     | yes            |
| TVCZ | 43                       | 18                            | 1510          | yes                     | yes                     | TVCZ                     | 8                             | 54            | 260                     | yes                     | yes            |
| TVCZ | 42                       | 17                            | 1470          | barren                  | oligotypical            | TVCZ                     | 7                             | 55            | 230                     | yes                     | yes            |
| TVCZ | 41                       | 16B                           | 1440          | missing<br>sample       | yes                     | TVCZ                     | 6                             | 56            | 185                     | yes                     | yes            |
| TVCZ | 40                       | 16                            | 1410          | yes                     | yes                     | TVCZ                     | 5                             | 57            | 150                     | yes                     | yes            |
| TVCZ | 39                       | 15                            | 1365          | barren                  | yes                     | TVCZ                     | 4                             | 58            | 130                     | yes                     | yes            |
| TVCZ | 38                       | 14B                           | 1320          | missing<br>sample       | yes                     | TVCZ                     | 3                             | 59            | 90                      | yes                     | yes            |
| TVCZ | 37                       | 14                            | 1290          | barren                  | yes                     | TVCZ                     | 2                             | 60            | 45                      | yes                     | yes            |
| TVCZ | 36                       | 13                            | 1240          | oligotypical            | oligotypical            | TVCZ                     | 1                             | 61            | 10                      | yes                     | yes            |
| TVCZ | 35                       | 12B                           | 1215          | -                       | yes                     | section base             |                               | 0             |                         |                         |                |
